# Supplementary material for: Efficient Isolation of Bacterial RNAs Using Silica-Based Materials Modified with Ionic Liquids
Source: MDPI journal article supplement (doi:10.3390/life11101090), 2021-10-15
Supplement: s1 [file s1]

Article

# Efficient Isolation of Bacterial RNAs Using Silica-Based Materials Modified with Ionic Liquids

Patrícia Pereira <sup>1,2,†</sup>, Augusto Q. Pedro <sup>3,†</sup>, Márcia C. Neves <sup>3</sup>, João C. Martins <sup>4</sup>, Inês Rodrigues <sup>4</sup>, Mara G. Freire <sup>3,\*</sup>, and Fani Sousa <sup>4,\*</sup>

<sup>1</sup> CEMMPRE, Department of Chemical Engineering, University of Coimbra, Rua Sílvio Lima-Pólo II, 3030-790 Coimbra, Portugal; papereira@ipn.pt

<sup>2</sup> IPN, Instituto Pedro Nunes, Associação para a Inovação e Desenvolvimento em Ciência e Tecnologia, Rua Pedro Nunes, 3030-199 Coimbra, Portugal

<sup>3</sup> CICECO—Aveiro Institute of Materials, Department of Chemistry, University of Aveiro, 3810-193 Aveiro, Portugal; apedro@ua.pt (A.Q.P.); mcneves@ua.pt (M.C.N.)

<sup>4</sup> CICS-UBI—Health Sciences Research Centre, Universidade da Beira Interior, 6200-506 Covilhã, Portugal; joao\_martins1994@hotmail.com (J.C.M.); ines\_rodrigues@hotmail.com (I.R.)

\* Correspondence: maragfreire@ua.pt (M.G.F.); fani.sousa@fcsaude.ubi.pt (F.S.); Tel.: +35-12-3440-1422 (M.G.F.); +35-12-7532-9074 (F.S.)

† These authors contributed equally to this work

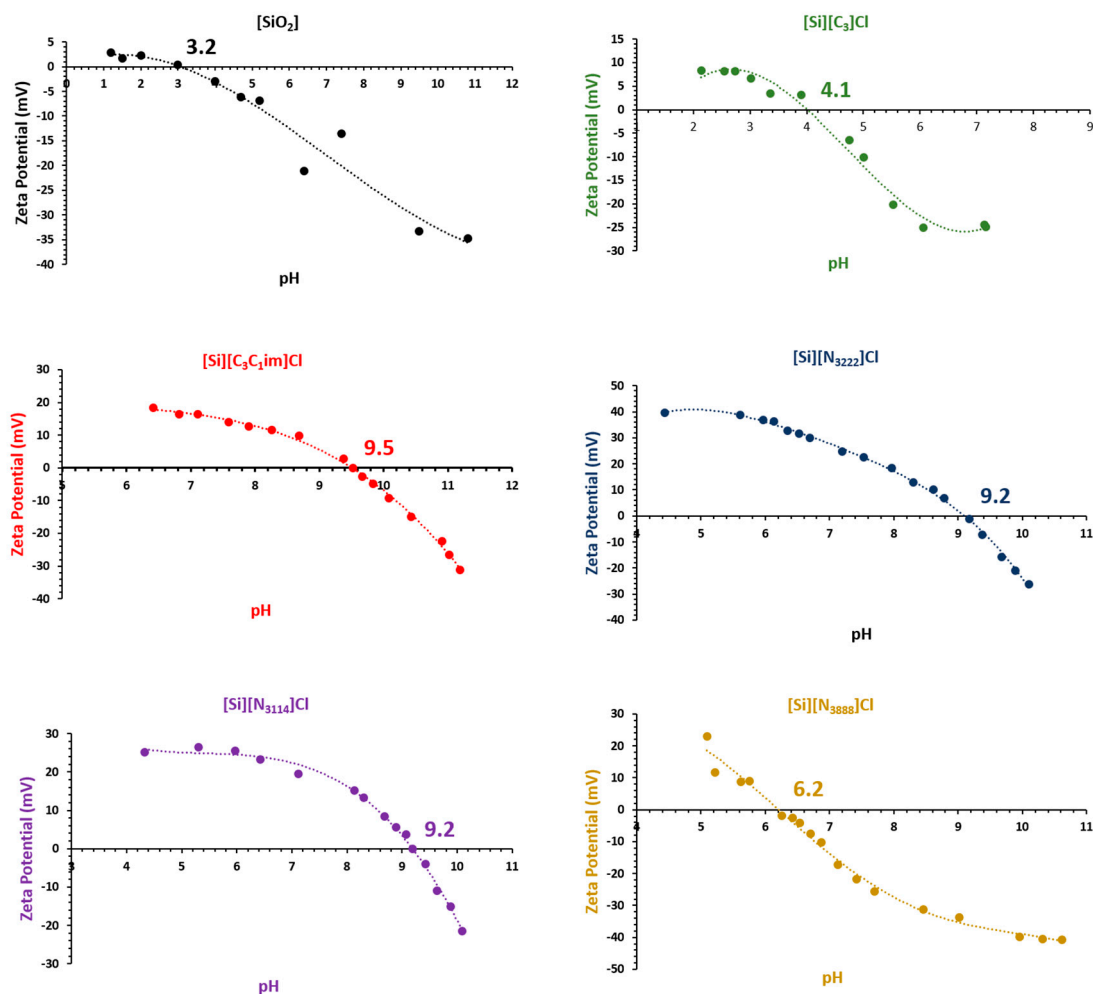

**Figure S1.** – Zeta potential values as a function of pH and values of point of zero charge (PZC) for  $\text{SiO}_2$ ,  $[\text{Si}][\text{C}_3]\text{Cl}$  and IL-functionalized silica supports.

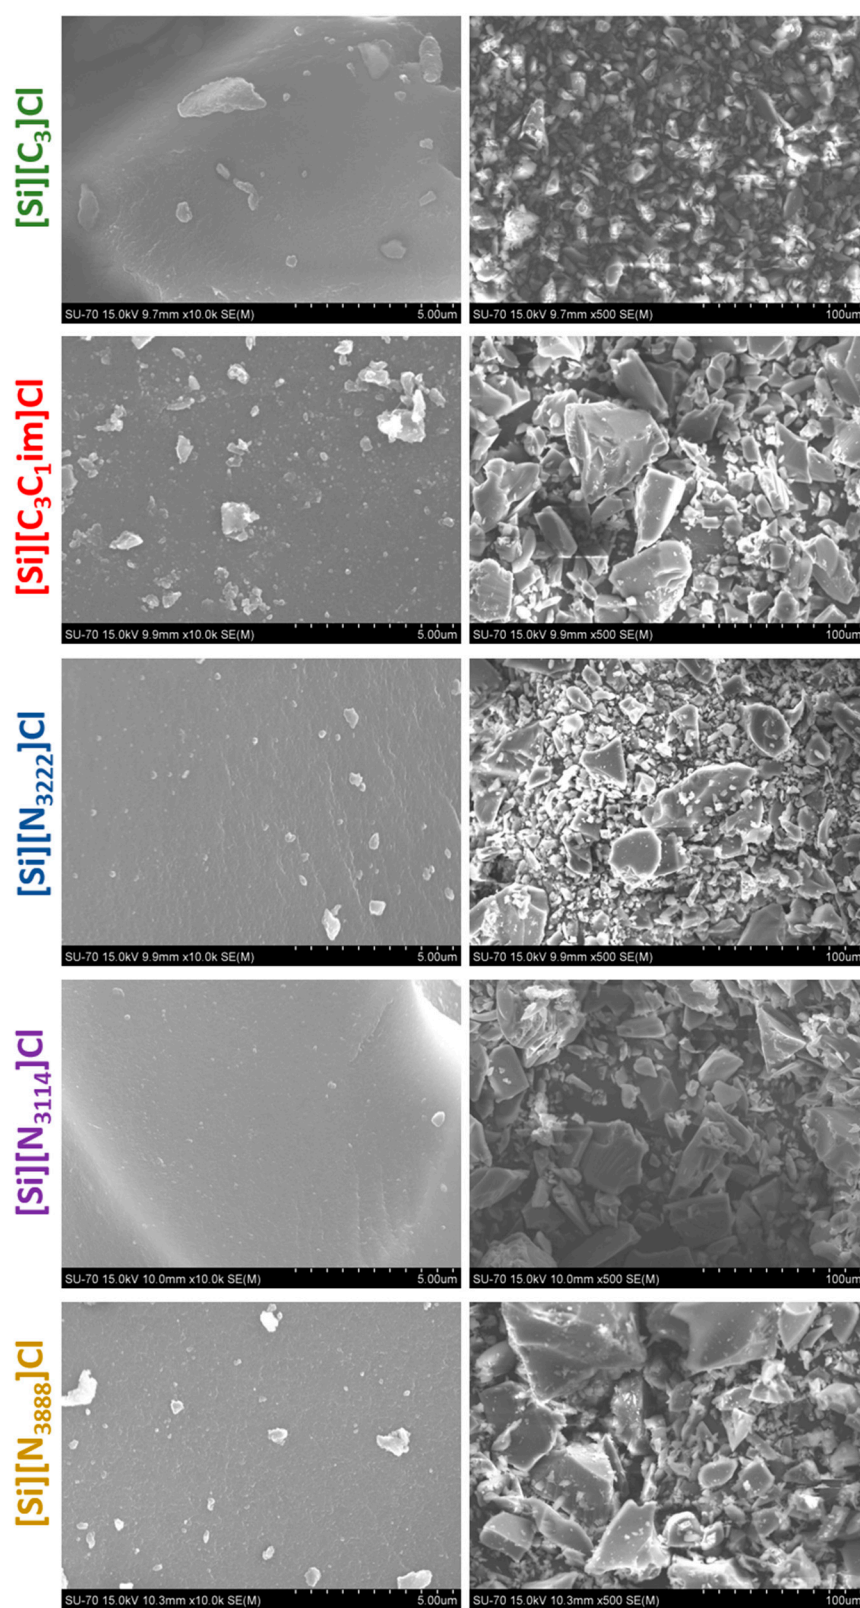

Figure S2. - SEM images of [Si][C<sub>3</sub>]Cl and IL-functionalized silica supports.

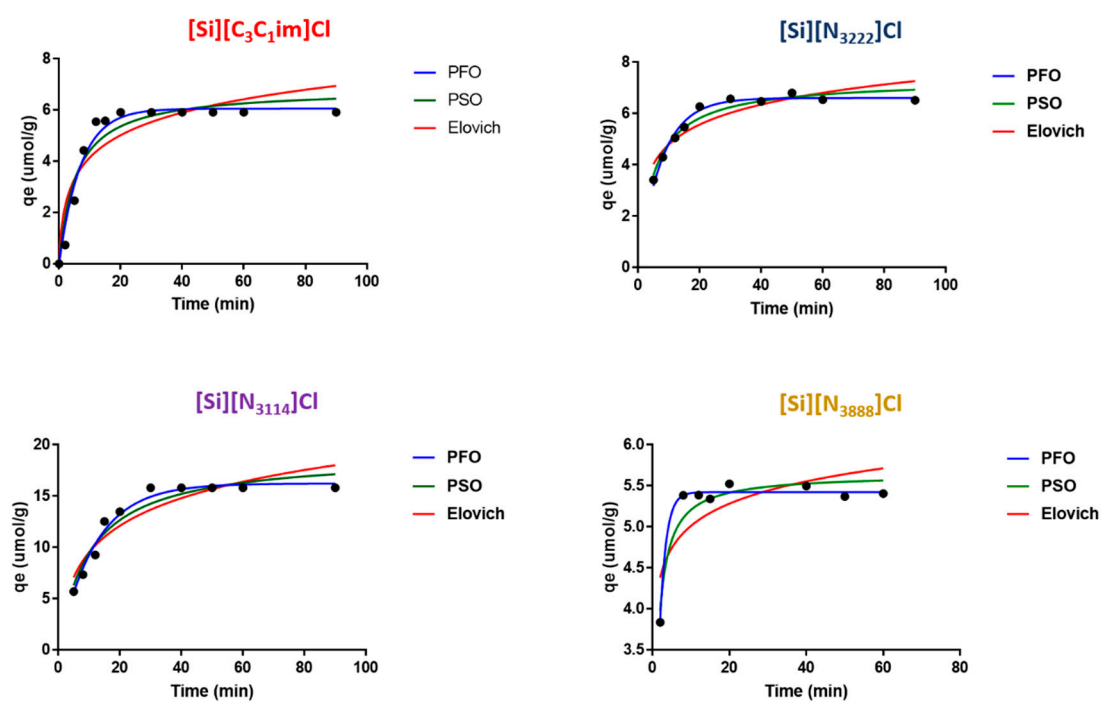

**Figure S3.** – Fitting of the adsorption kinetic data of tRNA onto IL-functionalized silica supports at 25°C by the PFO, PSO, and Elovich models.
